# Supplementary material for: Modulation of Prdm9-controlled meiotic chromosome asynapsis overrides hybrid sterility in mice
Source: eLife. 2018 Mar 14;7:e34282. doi: 10.7554/eLife.34282 (PMC5902161; doi:10.7554/eLife.34282)
Supplement: Figure 2—source data 1. [file elife-34282-fig2-data1.xlsx]

## Sheet: Sheet1
Figure 2–source data 1. Asynapsis rate of individual chromosomes of (PWD x B6)F1 hybrid males
Chromosome	Asynapsis	Asynapsis	Synapsis	Complete Asynapsis	Partial Asynapsis	Intermingled Asynapsis	Number of Males per Chr	Analyzed cells	Comlete Asynapsis	Partial Asynapsis	Intermingled Asynapsis
Name	Mean [%]	95% CI	Mean [%]	Mean [%]	Mean [%]	Mean [%]	N	n, per male	n, per male	n, per male	n, per male
chr1	2.64317	1.2; 5.8	97.3568	0.440529	2.20042	1.28388e-14	2	125; 102	1; 0	5; 0	0; 0
chr2	2.7451	1.3; 5.6	97.2549	1.56863	1.17525	1.32546e-13	2	103; 152	1; 3	0; 3	0; 0
chr3	11.5578	7.8; 16.8	88.4422	6.53266	2.51086	2.51256	2	81; 118	4; 9	2; 3	4; 1
chr4	6.51163	3.9; 10.7	93.4884	0.465116	4.64793	1.39535	2	110; 105	1; 0	7; 3	2; 1
chr5	10.5611	7.6; 14.6	89.4389	8.25083	1.31935	0.990099	3	85; 89; 129	6; 9; 10	0; 3; 1	0; 2; 1
chr6	5.14286	2.7; 9.6	94.8571	1.14286	3.99653	4.14891e-14	2	70; 105	1; 1	2; 5	0; 0
chr7	12.7551	8.8; 18.2	87.2449	8.67347	4.07857	9.47922e-18	2	94; 102	10; 7	2; 6	0; 0
chr8	10.6667	7.3; 15.4	89.3333	3.55556	7.11255	6.5089e-16	2	93; 132	3; 5	10; 6	0; 0
chr9	5	2.8; 8.8	95	0.454545	4.54226	1.47715e-13	2	107; 113	0; 1	3; 7	0; 0
chr10	12.5561	8.8; 17.6	87.4439	4.93274	5.82666	1.79372	2	114; 109	8; 3	3; 10	2; 2
chr11	5.94059	3.4; 10.2	94.0594	0.990099	1.48405	3.46535	2	126; 76	2; 0	2; 1	5; 2
chr12	12.5683	8.5; 18.2	87.4317	10.3825	2.1843	2.69707e-13	2	92; 91	10; 9	2; 2	0; 0
chr13	4.44444	2.6; 7.4	95.5556	3.49206	0.951685	6.05256e-17	3	112; 106; 97	3; 4; 4	2; 0; 1	0; 0; 0
chr14	7.83582	5.2; 11.7	92.1642	1.86567	4.84686	1.1194	2	129; 139	4; 1	3; 10	0; 3
chr15	20.0935	15.3; 26.0	79.9065	14.9533	4.66941	0.46729	2	102; 112	18; 14	3; 7	0; 1
chr16	22.7723	17.5; 29.1	77.2277	15.3465	6.43198	0.990099	2	111; 91	16; 15	7; 6	2; 0
chr17	14.5631	10.4; 20.1	85.4369	12.1359	2.42491	4.5965e-15	2	111; 95	12; 13	5; 0	0; 0
chr18	30.4598	24.1; 37.7	69.5402	29.8851	0.574278	2.74542e-14	2	92; 82	29; 23	1; 0	0; 0
chr19	42.1687	34.9; 49.8	57.8313	39.759	2.4079	1.36731e-13	2	80; 86	36; 30	1; 3	0; 0
Synapsis and classes of asynapsis are based on the GLMM model to take into account the unequal numbers of cells analyzed per males.
