# Supplementary material for: Modulation of Prdm9-controlled meiotic chromosome asynapsis overrides hybrid sterility in mice
Source: eLife. 2018 Mar 14;7:e34282. doi: 10.7554/eLife.34282 (PMC5902161; doi:10.7554/eLife.34282)
Supplement: Figure 2—source data 2. [file elife-34282-fig2-data2.xlsx]

## Sheet: Sheet1
Figure 2–source data 2. Chromosome-scale comparison of expected DSBs in symmetric hotspots and asynapsis rate.
Chr#	SPO11-oligos RPM1	Expected DSBs2	Expected symmetric DSBs3	S.D.	Probability of >=2 DSBs	Observed asynapsis rate
chr1	69606	17.5663	4.91856	1.47557	0.9578	0.024
chr2	73115	18.4518	5.16652	1.54996	0.9671	0.0245912
chr3	53878	13.5971	3.80718	1.14215	0.9123	0.116813
chr4	60332	15.2258	4.26323	1.27897	0.9384	0.0645022
chr5	62217	15.7015	4.39643	1.31893	0.94	0.106972
chr6	52717	13.3041	3.72514	1.11754	0.9131	0.05
chr7	52687	13.2965	3.72302	1.1169	0.908	0.127555
chr8	50769	12.8124	3.58748	1.07625	0.9036	0.111559
chr9	50618	12.7743	3.57681	1.07304	0.8997	0.0494169
chr10	49930	12.6007	3.5282	1.05846	0.8957	0.125825
chr11	55509	14.0087	3.92243	1.17673	0.921	0.0554511
chr12	45270	11.4247	3.19891	0.959673	0.8643	0.125657
chr13	46151	11.647	3.26116	0.978349	0.8788	0.0446429
chr14	44188	11.1516	3.12245	0.936736	0.862	0.0774915
chr15	40639	10.256	2.87167	0.861501	0.833	0.201155
chr16	37055	9.35148	2.61841	0.785524	0.7994	0.227997
chr17	39641	10.0041	2.80115	0.840344	0.8187	0.144998
chr18	34544	8.71778	2.44098	0.732294	0.7679	0.303287
chr19	25629	6.46793	1.81102	0.543306	0.6245	0.42311
chrX	36779	9.28182	NA	NA	NA	NA
chrY	9345	2.35837	NA	NA	NA	NA
Total	990619	250	NA	NA	NA	NA
1Data from Lange et al., 2016 on B6 males.
2Expected distribution of DSBs per one zygotene cell.
3Expected symmetric DSBs per one zygotene cell based on data from Davies et al. 2016.
