# Supplementary material for: Modulation of Prdm9-controlled meiotic chromosome asynapsis overrides hybrid sterility in mice
Source: eLife. 2018 Mar 14;7:e34282. doi: 10.7554/eLife.34282 (PMC5902161; doi:10.7554/eLife.34282)
Supplement: Figure 3—source data 1. [file elife-34282-fig3-data1.xlsx]

## Sheet: Table S3
Figure 3–source data 1. Two-chr cross. The effect of the size and location of PWD/PWD conspecific intervals on asynapsis of Chr 5 and on fertility parameters.
Male ID	Distance from the centromere of Chr 5 (total length 151.8 Mb)																PWD/PWD length	Asynapsis of Chr 5		Cells analyzed	Testes weight	Sperm count
	4.9	5.2	9.8	24.5	28.1	45	61.4	64.1	107	119	125.4	127	127.7	132.1	137.7	151	Mb, range	%	95 % CI	N	mg	106
69064	PP	PP	PP	PP	PP	PP	PP	PP	PP	PP	PP	PP	PP	PP	PP	PP	151.8; 151.8	2	0.3; 6.0	100	54	0
69133	PP	PP	PP	PP	PP	PP	PP	PP	PP	PP	PP	PP	PP	PP	PP	PP	151.8; 151.8	2	0.3; 6.0	100	64	0
67974	PB	PB	PB	PB		PP	PP	PP	PP	PP	PP	PP	PP	PP	PP	PP	106.8; 123.7	0	0.0; 2.4	83	69	0
69083	PB	PB	PB	PB	PB		PP	PP	PP	PP	PP	PP	PP	PP	PP	PP	90.4; 106.8	1	0.1; 4.3	100	63	0
67730	PB	PB	PB	PB	PB		PP	PP	PP	PP	PP	PP	PP	PP	PP	PP	90.4; 106.8	0	0.0; 2.0	99	57	0
67878	PB	PB	PB	PB	PB	PB		PP	PP	PP	PP	PP	PP	PP	PP	PP	87.7; 90.4	1	0.1; 4.3	100	58	0
67882	PB	PB	PB	PB	PB	PB	PB		PP	PP	PP	PP	PP	PP	PP	PP	44.8; 87.7	2	0.3; 6.0	100	59	0
67876	PB	PB	PB	PB	PB	PB		PP	PP	PP		PB	PB	PB	PB	PB	54.9; 64.0	0	0.0; 2.0	100	69	0
69062	PB	PB	PB	PB	PB	PB	PB		PP	PP	PP	PP	PP	PP	PP	PP	44.8; 87.7	1	0.1; 4.3	100	58	0
67973	PB	PB	PB	PB	PB	PB	PB	PB		PP	PP	PP	PP	PP	PP	PP	32.8; 44.8	3	0.8; 7.6	100	67	0
69137	PB	PB	PB	PB	PB	PB	PB	PB	PB	PB	PB	PB		PP	PP	PP	19.7; 24.1	1	0.1; 4.3	100	55	0
69846	PB	PB	PB	PB	PB	PB	PB	PB	PB	PB	PB	PB	PB		PP	PP	14.1; 19.7	3	0.8; 7.6	100	NA	NA
69328	PB	PB	PB	PB	PB	PB	PB	PB	PB	PB	PB	PB	PB	PB		PP	0.8; 14.1	12	6.6; 19.3	100	82	0
69186	PB	PB	PB	PB	PB	PB	PB	PB	PB	PB	PB	PB	PB	PB		PP	0.8; 14.1	5	1.8; 10.4	100	66	0
69138	PB	PB	PB	PB	PB	PB	PB	PB	PB	PB	PB	PB	PB	PB	PB	PB	0.0; 0.0	19	12.1; 27.4	100	55	0
69184	PB	PB	PB	PB	PB	PB	PB	PB	PB	PB	PB	PB	PB	PB	PB	PB	0.0; 0.0	9	4.4; 15.6	100	74	0
69281	PB	PB	PB	PB	PB	PB	PB	PB	PB	PB	PB	PB	PB	PB	PB	PB	0.0; 0.0	11	5.9; 18.1	100	71	0
69331	PB	PB	PB	PB	PB	PB	PB	PB	PB	PB	PB	PB	PB	PB	PB	PB	0.0; 0.0	11	5.9; 18.1	100	63	0
69440	PB	PB	PB	PB	PB	PB	PB	PB	PB	PB	PB	PB	PB	PB	PB	PB	0.0; 0.0	12	6.6; 19.3	100	68	0
69441	PB	PB	PB	PB	PB	PB	PB	PB	PB	PB	PB	PB	PB	PB	PB	PB	0.0; 0.0	10	5.1; 16.9	100	71	0
69136	PP	PP	PP		PB	PB	PB	PB	PB	PB	PB	PB	PB	PB	PB	PB	9.8; 24.5	4	1.3; 9.0	100	61	0
69847	PP	PP	PP		PB	PB	PB	PB	PB	PB	PB	PB	PB	PB	PB	PB	9.8; 24.5	0	0.0; 2.0	100	NA	NA
67877	PP	PP	PP	PP		PB	PB	PB	PB	PB	PB	PB	PB	PB	PB	PB	24.5; 28.1	1	0.1; 4.3	100	65	0
69082	PP	PP	PP	PP	PP	PP		PB	PB	PB		PB	PB	PB	PB	PB	45.0; 61.4	0	0.0; 2.0	100	71	0
67883	PP	PP	PP	PP	PP	PP	PP	PP		PB	PB	PB	PB	PB	PB	PB	64.1; 107.0	0	0.0; 2.0	100	62	0
67977	PP	PP	PP	PP	PP	PP	PP	PP	PP	PP	PP	PP	PP	PP	PP		137.7; 151.0	1	0.1; 4.3	100	67	0
The minimal and maximal length of PWD/PWD interval was determined by positions of the DNA markers used for genotyping. White and orange intervals are heterozygous PWD/B6 and homozygous PWD/PWD, respectively. Recombination breaks are located in gray intervals.
Sperm count refers to the number of sperm cells in both epididymis, TW is the wet weight of paired testes in milligrams.
