# Supplementary material for: Modulation of Prdm9-controlled meiotic chromosome asynapsis overrides hybrid sterility in mice
Source: eLife. 2018 Mar 14;7:e34282. doi: 10.7554/eLife.34282 (PMC5902161; doi:10.7554/eLife.34282)
Supplement: Figure 3—source data 2. [file elife-34282-fig3-data2.xlsx]

## Sheet: Table S4
Figure 3–source data 2. Two-chr cross. The effect of the size and location of PWD/PWD conspecific intervals on asynapsis of Chr 12 and on fertility parameters.
Male ID	Distance from centromere of Chr 12 (total length 120.1 Mb)										PWD/PWD length	Asynapsis of Chr 12		Cells analyzed	Testes weight	Sperm count
	5.4	7.6	15.7	19.8	30.8	35	54.6	91	103.4	113.8	Mb, range	%	95% CI	N	mg	106
69064	PP	PP	PP	PP	PP	PP	PP	PP		PB	91.0; 103.4	0	0.0; 2.0	100	54	0
67977	PB	PB	PB	PB	PB		PP	PP	PP		48.8; 78.8	0	0.0; 2.0	100	67	0
67876	PP	PP	PP	PP	PP	PP		PB	PB	PB	35.0; 54.6	1	0.1; 4.3	100	69	0
69144	PP	PP	PP	PP		PB	PB		PP	PP	36.5; 59.9	1	0.1; 4.3	100	66	0	.
69760	PP	PP	PP	PP		PB	PB	PB	PB	PB	19.8; 30.8	1	0.1; 4.3	100	65	0
69133	PP	PP	PP	PP		PB	PB	PB	PB	PB	19.8; 30.8	3	0.8; 7.6	100	64	0
67973		PP	PP	PP		PB	PB	PB	PB	PB	12.2; 25.4	6	2.4; 11.8	100	67	0
69281	PP	PP		PB	PB	PB	PB	PB	PB	PB	7.6; 15.7	4	1.3; 9.0	100	71	0
67974	PB	PB	PB	PB	PB	PB	PB	PB	PB	PB	0.0; 0.0	10	5.1; 16.9	100	69	0
69136	PB	PB	PB	PB	PB	PB	PB	PB	PB	PB	0.0; 0.0	9	4.4; 15.6	100	61	0
69138	PB	PB	PB	PB	PB	PB	PB	PB	PB	PB	0.0; 0.0	9	4.4; 15.6	100	55	0
69184	PB	PB	PB	PB	PB	PB	PB	PB	PB	PB	0.0; 0.0	8	3.7; 14.4	100	71	0
69282	PB	PB	PB	PB	PB	PB	PB	PB	PB	PB	0.0; 0.0	6	2.4; 11.8	100	67	0
69328	PB	PB	PB	PB	PB	PB	PB	PB	PB	PB	0.0; 0.0	12	6.6; 19.3	100	66	0
69331	PB	PB	PB	PB	PB	PB	PB	PB	PB	PB	0.0; 0.0	5	1.8; 10.4	100	63	0
69441	PB	PB	PB	PB	PB	PB	PB	PB	PB	PB	0.0; 0.0	8	3.7; 14.4	100	68	0
69663	PB	PB	PB	PB	PB	PB	PB	PB	PB	PB	0.0; 0.0	4	1.3; 9.0	100	70	0
69664	PB	PB	PB	PB	PB	PB	PB	PB	PB	PB	0.0; 0.0	8	3.7; 14.4	100	71	0
69847	PB	PB	PB	PB	PB	PB	PB	PB	PB	PB	0.0; 0.0	5	1.8; 10.4	100	63	0
69186	PB	PB	PB	PB	PB	PB	PB	PB		PP	6.3; 16.7	10	5.1; 16.9	100	82	0
69763	PB	PB	PB	PB	PB	PB	PB	PB		PP	6.3; 16.7	3	0.8; 7.6	100	68	0
69427	PB	PB	PB	PB	PB	PB	PB	PB		PP	6.3; 16.7	0	0.0; 2.0	100	68	0
69082	PB	PB	PB	PB	PB	PB	PB	PB		PP	6.3; 16.7	0	0.0; 2.0	100	71	0
69062	PB	PB	PB	PB	PB	PB		PP	PP	PP	29.1; 65.5	2	0.3; 6.0	100	59	0
69083	PB	PB	PB	PB	PB	PB		PP	PP	PP	29.1; 65.5	1	0.1; 4.3	100	57	0
The minimal and maximal length of PWD/PWD interval was determined by positions of the DNA markers used for genotyping. White and orange intervals are heterozygous PWD/B6 and homozygous PWD/PWD, respectively. Recombination breaks are located in gray intervals.
Sperm count refers to the number of sperm cells in both epididymis, TW is the wet weight of paired testes in milligrams.
