# Supplementary material for: Modulation of Prdm9-controlled meiotic chromosome asynapsis overrides hybrid sterility in mice
Source: eLife. 2018 Mar 14;7:e34282. doi: 10.7554/eLife.34282 (PMC5902161; doi:10.7554/eLife.34282)
Supplement: Figure 3—source data 3. [file elife-34282-fig3-data3.xlsx]

## Sheet: Table S5
Figure 3–source data 3. Two-chr cross. The effect of the size and location of PWD/PWD conspecific intervals on asynapsis of Chr 7 and on fertility parameters
Male ID	Distance from the centromere of Chr 7 (total length 145.4 Mb)									PWD/PWD length	Asynapsis of Chr 5		Cells analyzed	Testes weight	Sperm count
	3.3	18	24.6	25.7	30.3	87.5	119.7	131	144.7	Mb, range	%	95% CI	N	mg	106
69468	PP	PP	PP	PP		PB	PB		PP	26.4; 44.7	4	1.3; 9.0	100	56	0
69745	PP	PP	PP		PB	PB	PB	PB	PB	24.6; 25.7	11	5.9; 18.1	100	64	0
69744	PP	PP		PB	PB	PB	PB	PB	PB	18.0; 24.6	8	3.7; 14.4	100	65	0
69934	PB	PB	PB	PB	PB	PB	PB	PB	PB	0.0; 0.0	10	5.1; 16.9	100	68	0
69935	PB	PB	PB	PB	PB	PB	PB	PB	PB	0.0; 0.0	9	4.4; 15.6	100	64	0
69878	PB	PB	PB	PB	PB	PB	PB	PB	PB	0.0; 0.0	8	3.7; 14.4	100	65	0
69627	PB	PB	PB	PB	PB	PB	PB	PB	PB	0.0; 0.0	8	3.7; 14.4	100	64	0
69467	PB	PB	PB	PB	PB	PB	PB	PB	PB	0.0; 0.0	7	3.1; 13.1	100	58	0
69626	PB	PB	PB	PB	PB	PB	PB	PB	PB	0.0; 0.0	3	0.8; 7.6	100	63	0
69780	PB	PB	PB	PB	PB	PB	PB	PB	PB	0.0; 0.0	1	0.1; 4.3	100	60	0
69572	PB	PB	PB	PB	PB	PB	PB		PP	0.7; 14.4	8	3.7; 14.4	100	57	0
37007	PB	PB	PB	PB	PB	PB	PB		PP	0.7; 14.4	4	1.2; 9.1	98	69	0
69625	PB	PB	PB	PB	PB	PB	PB		PP	0.7; 14.4	1	0.1; 4.3	100	65	0
69877	PB	PB	PB	PB	PB	PB		PP	PP	14.4; 25.7	1	0.1; 4.3	100	56	0
69781	PB	PB	PB		PP	PP	PP	PP		100.7; 119.0	3	0.8; 7.6	100	62	0
The minimal and maximal length of PWD/PWD interval was determined by positions of the DNA markers used for genotyping. White and orange intervals are heterozygous PWD/B6 and homozygous PWD/PWD, respectively. Recombination breaks are located in gray intervals.
Sperm count refers to the number of sperm cells in both epididymis, TW is the wet weight of paired testes in milligrams.
