# Supplementary material for: Modulation of Prdm9-controlled meiotic chromosome asynapsis overrides hybrid sterility in mice
Source: eLife. 2018 Mar 14;7:e34282. doi: 10.7554/eLife.34282 (PMC5902161; doi:10.7554/eLife.34282)
Supplement: Figure 3—source data 4. [file elife-34282-fig3-data4.xlsx]

## Sheet: Table S6
Figure 3–source data 4. Two-chr cross. The effect of the size and location of PWD/PWD conspecific intervals on asynapsis of Chr 15 and on fertility parameters.
Male ID	Distance from centromere of Chr 15 (total length 104.0 Mb)										PWD/PWD length	Asynapsis of Chr 15		Cells analyzed	Testes weight	Sperm count
	9.3	40	63	70.2	97	97.8	100.6	101.9	102.8	103.4	Mb, range	%	95% CI	N	mg	106
69571	PP	PP		PB	PB	PB	PB	PB	PB	PB	40.0; 63.0	2	0.3; 6.0	100	69	0
69623	PP		PB	PB	PB	PB	PB	PB	PB	PB	9.3; 40.0	2	0.3; 6.0	100	65	0
69783	PB	PB	PB	PB	PB	PB	PB	PB	PB	PB	0.0; 0.0	3	0.8; 7.6	100	56	0
69784	PB	PB	PB	PB	PB	PB	PB	PB	PB	PB	0.0; 0.0	11	5.9; 18.1	100	60	0
69566	PB	PB	PB	PB	PB	PB	PB	PB	PB	PB	0.0; 0.0	13	7.4; 20.5	100	72	0
69469	PB	PB	PB	PB	PB	PB	PB	PB	PB	PB	0.0; 0.0	16	9.7; 24.0	100	56	0
69565	PB	PB	PB	PB	PB	PB	PB	PB	PB	PB	0.0; 0.0	16	9.7; 24.0	100	68	0
69625	PB	PB	PB	PB	PB	PB	PB	PB	PB	PB	0.0; 0.0	16	9.7; 24.0	100	65	0
69624	PB	PB	PB	PB	PB	PB	PB	PB	PB	PB	0.0; 0.0	19	12.1; 27.4	100	59	0
69746	PB	PB	PB	PB	PB	PB	PB	PB	PB	PB	0.0; 0.0	21	13.8; 29.7	100	62	0
69743	PB	PB	PB	PB	PB	PB	PB	PB	PB	PB	0.0; 0.0	21	13.8; 29.7	100	65	0
69781	PB	PB	PB	PB	PB	PB	PB		PP	PP	1.2; 2.1	24	16.4; 33.0	100	62	0
69878	PB	PB	PB	PB	PB	PB	PB		PP	PP	1.2; 2.1	23	15.5; 31.9	100	65	0
69782	PB	PB	PB	PB	PB	PB	PB		PP	PP	1.2; 2.1	16	9.7; 24.0	100	58	0
69879	PB	PB	PB	PB		PP	PP	PP	PP	PP	6.2; 7.0	0	0.0; 2.0	100	58	0
The minimal and maximal length of PWD/PWD interval was determined by positions of the DNA markers used for genotyping. White and orange intervals are heterozygous PWD/B6 and homozygous PWD/PWD, respectively. Recombination breaks are located in gray intervals.
Sperm count refers to the number of sperm cells in both epididymis, TW is the wet weight of paired testes in milligrams.
