# Supplementary material for: Modulation of Prdm9-controlled meiotic chromosome asynapsis overrides hybrid sterility in mice
Source: eLife. 2018 Mar 14;7:e34282. doi: 10.7554/eLife.34282 (PMC5902161; doi:10.7554/eLife.34282)
Supplement: Figure 3—source data 5. [file elife-34282-fig3-data5.xlsx]

## Sheet: Table S7
Figure 3–source data 5. Two-chr cross. The effect of the size and location of PWD/PWD conspecific intervals on asynapsis of Chr 17 and on fertility parameters.
Male ID	Distance from centromere of Chr 17 (total length 95.0 Mb)										PWD/PWD length	Asynapsis of Chr 17		Cells analyzed	Testes weight	Sperm count
	4.8	15	15.6	30.9	34.7	45.4	52.7	65.3	73.8	93.2	Mb, range	%	95% CI	N	mg	106
64979	PB	PB	PB	PB	PB	PB	PB	PB	PB	PB	0.0; 0.0	18.8	12.0; 27.1	101	72	0
66707	PB	PB	PB	PB	PB	PB	PB	PB	PB	PB	0.0; 0.0	14.9	8.9; 22.7	101	63	0
64855	PB	PB	PB	PB	PB	PB	PB	PB	PB	PB	0.0; 0.0	14.9	8.9; 22.7	101	73	0
66954	PB	PB	PB	PB	PB	PB	PB	PB	PB	PB	0.0; 0.0	14.6	8.7; 22.3	103	71	0
64574	PB	PB	PB	PB	PB	PB	PB	PB	PB	PB	0.0; 0.0	11.7	6.5; 18.8	103	68	0
64977	PB	PB	PB	PB	PB	PB	PB	PB	PB	PB	0.0; 0.0	11.2	6.3; 17.8	116	63	0
64718	PB	PB	PB	PB	PB	PB	PB	PB	PB	PB	0.0; 0.0	12.5	6.9; 20.1	96	68	0
64849	PB	PB	PB	PB	PB	PB	PB	PB	PB	PB	0.0; 0.0	7	3.1; 13.0	102	76	0
66515	PB	PB	PB	PB	PB	PB	PB	PB		PP	1.8; 21.2	16	9.5; 24.4	92	75	0
66514	PB	PB	PB	PB	PB	PB	PB	PB		PP	1.8; 21.2	14	8.1; 21.7	100	71	0
64851	PB	PB	PB	PB	PB	PB	PB	PB		PP	1.8; 21.2	10.5	5.6; 17.3	105	69	0
64719	PB	PB	PB	PB	PB	PB	PB	PB		PP	1.8; 21.2	5.8	2.4; 11.3	106	62	0
66819	PB	PB	PB	PB	PB	PB	PB	PB		PP	1.8; 21.2	3.4	0.9; 8.2	100	72	0
66813	PB	PB	PB	PB	PB	PB	PB		PP	PP	21.2; 29.7	1	0.1; 4.2	104	68	0
66876	PB	PB	PB	PB	PB			PP	PP	PP	29.7; 42.3	0	0.0; 2.0	97	58	0
64575	PB	PB	PB	PB	PB		PP	PP	PP	PP	42.3; 49.6	0	0.0; 1.9	103	73	0
64922	PB	PB	PB	PB	PB		PP	PP	PP	PP	42.3; 49.6	2.8	0.7; 7.1	108	69	0
64975	PP		PB	PB	PB	PB	PB	PB	PB	PB	4.8; 15.0	7.9	3.7; 14.2	101	80	0
66532	PP		PB	PB	PB	PB	PB	PB	PB	PB	4.8; 15.0	6	2.4; 11.8	100	72	0
The minimal and maximal length of PWD/PWD interval was determined by positions of the DNA markers used for genotyping. White and orange intervals are heterozygous PWD/B6 and homozygous PWD/PWD, respectively. Recombination breaks are located in gray intervals.
Sperm count refers to the number of sperm cells in both epididymis, TW is the wet weight of paired testes in milligrams.
