# Supplementary material for: Modulation of Prdm9-controlled meiotic chromosome asynapsis overrides hybrid sterility in mice
Source: eLife. 2018 Mar 14;7:e34282. doi: 10.7554/eLife.34282 (PMC5902161; doi:10.7554/eLife.34282)
Supplement: Figure 3—source data 6. [file elife-34282-fig3-data6.xlsx]

## Sheet: Table S8
Figure 3–source data 6. Two-chr cross. The effect of the size and location of PWD/PWD conspecific intervals on asynapsis of Chr 18 and on fertility parameters.
Male ID	Distance from centromere of Chr 18 (90.7 Mb)					PWD/PWD length	Asynapsis of Chr 18		Cells analyzed	Testes weight	Sperm count
	3.8	25	57.4	76.9	89.6	Mb, range	%	95% CI	N	mg	106
64574	PB	PB	PB	PB	PB	0.0; 0.0	30.8	22.5; 40.1	104	68	0
64851	PB	PB	PB	PB	PB	0.0; 0.0	21.4	14.2; 30.0	103	69	0
64719	PB	PB	PB	PB	PB	0.0; 0.0	19.3	12.7; 27.4	109	62	0
64976	PB	PB	PB		PP	1.1; 13.8	28	19.8; 37.3	100	71	0
66876	PB	PB		PP	PP	13.8; 33.3	9.4	3.9; 18.1	64	58	0
66877	PB	PB		PP	PP	13.8; 33.3	1	0.1; 4.3	101	64	0
66532	PB	PB		PP	PP	13.8; 33.3	0	0.0; 2.5	78	72	0
66954	PB		PP	PP	PP	33.3; 65.7	0	0.0; 1.9	102	71	0
66813	PB		PP	PP	PP	33.3; 65.7	0	0.0; 1.7	113	68	0
64922	PP	PP	PP	PP	PP	90.7; 90.7	1.8	0.3; 5.5	109	69	0
64718	PP	PP	PP	PP	PP	90.7; 90.7	0	0.0; 2.0	100	68	0
64975	PP	PP	PP	PP	PP	90.7; 90.7	0	0.0; 2.0	100	80	0
64855	PP	PP	PP	PP		76.9; 89.6	0	0.0; 1.9	103	73	0
64849	PP	PP	PP	PP		76.9; 89.6	0	0.0; 2.0	100	76	0
64575	PP	PP	PP	PP		76.9; 89.6	2	0.3; 6.0	101	73	0
64968	PP	PP	PP	PP		76.9; 89.6	3	0.8; 7.6	101	73	0
64979	PP	PP	PP		PB	57.4; 76.9	1	0.1; 4.3	100	72	0
66872	PP	PP	PP		PB	57.4; 76.9	2	0.3; 6.0	103	73	0
66514	PP	PP	PP		PB	57.4; 76.9	3	0.8; 7.6	100	71	0
64977	PP	PP		PB	PB	25.0; 57.4	4.8	1.7; 10.0	104	63	0
66707	PP		PB	PB	PB	3.8; 25.0	4.9	1.8; 10.2	103	NA	0
66815	PP		PB	PB	PB	3.8; 25.0	11	6.0; 17.8	109	75	0
The minimal and maximal length of PWD/PWD interval was determined by positions of the DNA markers used for genotyping. White and orange intervals are heterozygous PWD/B6 and homozygous PWD/PWD, respectively. Recombination breaks are located in gray intervals.
Sperm count refers to the number of sperm cells in both epididymis, TW is the wet weight of paired testes in milligrams.
