# Supplementary material for: Modulation of Prdm9-controlled meiotic chromosome asynapsis overrides hybrid sterility in mice
Source: eLife. 2018 Mar 14;7:e34282. doi: 10.7554/eLife.34282 (PMC5902161; doi:10.7554/eLife.34282)
Supplement: Figure 3—source data 7. [file elife-34282-fig3-data7.xlsx]

## Sheet: Sheet1
Figure 3–source data 7. Change point estimates of the minimal length [Mb] of PWD/PWD homozygosity showing detectable effect on asynapsis rate
Chr#	Experiment	1Change point estimate	2Change point lower bound	3Change point upper bound
Chr5	2-chr cross	19.5	14.57	24.44
Chr7	2-chr cross	4NA	NA	NA
Chr12	2-chr cross	20.87	6.796	34.95
Chr15	2-chr cross	8.613	-2.865	20.09
Chr17	2-chr cross	29.31	10.29	48.33
Chr18	2-chr cross	25.32	19.68	30.96
Chr15	4-chr cross	52.00	0.713	3.293
Chr16	4-chr cross	12.8	8.434	17.16
Chr18	4-chr cross	33.42	10.8	56.04
Chr19	4-chr cross	19.16	12.26	26.06
Chr15	2-chr cross & 4-chr cross	7.316	1.535	13.1
Chr18	2-chr cross & 4-chr cross	27.13	21.32	32.94
Chr5,7,12,15,17,18	2-chr cross	27.14	19.36	34.91
Chr5,7,12,15-19	2-chr cross & 4-chr cross	28.4	23.18	33.63
1Change point estimate of the length [Mb] of PWD/PWD homozygosity in the piecewise linear regression model. For the length of PWD/PWD homozygosity greater than the change point, the asynapsis rate is modelled as constant.
2Lower bound of 95% CI.
3Upper bound of 95% CI.
4Change point cannot be determined.
5The estimate is influenced by two outliers with mouse ID 38759 and 38737.
