# Supplementary material for: Modulation of Prdm9-controlled meiotic chromosome asynapsis overrides hybrid sterility in mice
Source: eLife. 2018 Mar 14;7:e34282. doi: 10.7554/eLife.34282 (PMC5902161; doi:10.7554/eLife.34282)
Supplement: Figure 3—source data 8. [file elife-34282-fig3-data8.xlsx]

## Sheet: Table S15
Figure 3–source data 8. Selected SSLP markers polymorphic between B6 and PWD.
Chr No.	SSLP marker	Mbp
5	D5Mit346	4.88
5	D5Mit49	5.2
5	D5Mit178	9.83
5	D5Mit349	24.97
5	D5Mit386	28.1
5	D5Mit106	44.99
5	D5Mit302	61.43
5	D5Mit303	64.1
5	D5Mit277	107.06
5	D5Mit136	118.73
5	D5Mit138	125.1
5	D5Mit140	126.95
5	D5Mit59	127.72
5	D5Mit63	132.13
5	D5Mit326	137.43
5	D5Mit102	151.35
7	D7Mit21	3.27
7	D7Mit191	18.89
7	D7Mit180	24.63
7	D7Mit265	25.68
7	D7Mit246	30.3
7	D7Mit31	87.49
7	D7Mit66	119.89
7	D7Mit71	131.03
7	D7Mit259	144.76
12	D12Mit37	5.37
12	D12Mit215	7.61
12	D12Mit49	15.71
12	D12Mit11	22.39
12	D12Mit136	30.17
12	D12Mit147	35.72
12	D12Mit285	54.65
12	D12Mit118	91.51
12	D12Mit7	103.4
12	D12Mit20	113.36
15	D15Mit175	9.27
15	D15Mit130	20.81
15	D15Mit9	26.04
15	D15Mit138	40.03
15	D15Mit113	50.4
15	D15Mit270	63.52
15	D15Mit234	65.07
15	D15Mit67	70.2
15	D15Mit215	83.89
15	D15Mit161	97.01
15	D15Mit43	97.99
15	D15Mit97	100.8
15	D15Mit40	102.03
15	D15Mit16	102.99
15	D15Mit79	103.47
16	D16Mit55	6.24
16	D16Mit165	14
16	D16Mit29	20.2
16	D16Mit57	29.3
16	D16Mit12	39.12
16	D16Mit83	42.81
16	D16Mit76	67.72
16	D16Mit71	96.91
17	D17Mit19	4.81
17	D17M334	15
17	D17M634	15.6
17	D17Mit81	30.9
17	D17Mit33	34.74
17	D17Mit50	45.36
17	D17Mit139	52.66
17	D17Mit152	65.34
17	D17Mit93	73.8
17	D17Mit122	83.06
17	D17Mit155	84.5
17	D17Mit123	93.2
18	D18Mit66	3.84
18	D18Mit22	24.95
18	D18Mit84	33.83
18	D18Mit70	34.85
18	D18Mit149	45
18	D18Mit53	52.83
18	D18Mit55	53.16
18	D18Mit54	53.43
18	D18Mit124	57.46
18	D18Mit184	66.82
18	D18Mit209	66.97
18	D18Mit185	69.03
18	D18Mit7	76.85
18	D18Mit25	89.57
19	D19Mit32	3.28
19	D19Mit61	15.53
19	D19Mit128	17.25
19	D19Mit96	21.84
19	D19Mit46	32.94
19	D19Mit11	42.4
19	D19Mit71	59.6
