# Supplementary material for: Modulation of Prdm9-controlled meiotic chromosome asynapsis overrides hybrid sterility in mice
Source: eLife. 2018 Mar 14;7:e34282. doi: 10.7554/eLife.34282 (PMC5902161; doi:10.7554/eLife.34282)
Supplement: Figure 4—source data 1. [file elife-34282-fig4-data1.xlsx]

## Sheet: Table S10
Figure 4–source data 1. Eleven G3 male parents selected for the 4-Chr cross experiment
Male ID	Chr 15 (104 Mb)					Chr 16 (98,2 Mb)						Chr 18 (90,7 Mb)					Chr 19 (61,4 Mb)
	9.3	39.9	63.3	70.0	103.3	6.2	20.2	29.3	42.7	67.6	97.0	3.8	34.0	45.1	57.6	89.7	3.3	21.9	33.0	42.4	59.7
37487	PB	PB	PB	PB	PB	B	B	PB	PB	PB	PB	PB	PB	PB	PB	PB	PB	PB	PB	PB	PB
37504	B	PB	PB	PB	PB	PB	PB	PB	PB	PB	B	PB	PB	PB	PB	PB	B	PB	PB	PB	PB
37507	B	B	PB	PB	PB	PB	PB	B	B	B	B	PB	PB	B	B	B	PB	PB	PB	PB	PB
37715	PB	PB	PB	PB	PB	PB	PB	PB	PB	PB	PB	B	PB	PB	PB	PB	PB	PB	PB	PB	PB
37852	PB	PB	PB	PB	PB	PB	PB	PB	PB	PB	PB	PB	PB	PB	PB	B	PB	PB	PB	PB	PB
37871	PB	PB	PB	PB	PB	PB	PB	PB	PB	PB	B	PB	PB	PB	PB	PB	PB	PB	PB	PB	PB
37746	PB	PB	PB	PB	PB	PB	PB	PB	PB	PB	PB	B	PB	PB	PB	B	PB	PB	PB	PB	PB
37634	B	B	B	PB	PB	PB	PB	PB	PB	PB	PB	PB	PB	PB	PB	PB	PB	PB	PB	PB	PB
37616	PB	PB	PB	PB	PB	B	PB	PB	PB	PB	PB	B	B	PB	PB	PB	PB	PB	PB	PB	PB
37709	B	B	B	PB	PB	PB	PB	PB	PB	PB	PB	PB	PB	PB	PB	PB	PB	PB	PB	PB	PB
37862	PB	PB	PB	PB	PB	PB	PB	PB	PB	B	B	PB	PB	PB	PB	PB	PB	PB	PB	PB	B
PB - PWD/B6 heterozygosity
B - B6/B6 homozygosity
				.
