# Supplementary material for: Modulation of Prdm9-controlled meiotic chromosome asynapsis overrides hybrid sterility in mice
Source: eLife. 2018 Mar 14;7:e34282. doi: 10.7554/eLife.34282 (PMC5902161; doi:10.7554/eLife.34282)
Supplement: Figure 4—source data 2. [file elife-34282-fig4-data2.xlsx]

## Sheet: Table S11
Figure 4–source data 2. The fertility parameters of hybrids of the 4-chr cross experiment
Male ID	TW (mg)	Sperm x 10-6
38754	51	0
38428	57	0
38735	58	0
38088	59	0
38089	60	0
38753	60	0
38726	61	0
38751	61	0
38755	61	0
38435	62	0
38090	63	0
38085	64	0
38087	64	0
38448	64	0
38738	65	0
38739	65	0
38711	65	0
38728	65	0
38822	65	0
38430	66	0
38432	66	0
38710	66	0
38084	67	0
38434	67	0
38814	67	0
38752	68	0
38783	68	0
38817	68	0
38758	69	0
38821	69	0
38740	70	0
38766	70	0
38813	70	0
38426	71	0
38468	71	0
38765	72	0
38767	73	0
38819	73	0
38792	74	0
38818	74	0
38820	74	0
38815	75	0
75890	68	0
79414	65	0
38712	76	0.004
38733	73	0.005
38732	63	0.007
38561	78	0.01
38713	77	0.03
38727	62	0.033
38757	72	0.04
38427	64	0.06
38429	64	0.09
38425	73	0.1
38566	63	0.17
38734	66	0.21
38086	73	0.23
38725	69	0.29
38852	75	0.34
38842	89	0.43
38759	81	0.6
38858	73	0.74
38763	81	1.02
38736	81	1.1
38764	84	1.1
38741	81	1.2
38801	83	1.51
38565	70	1.61
38794	90	1.8
38737	94	1.9
75889	90	2.1
38692	89	2.2
79415	83	2.2
38724	71	2.8
79417	90	2.8
79412	103	3.9
38433	78	4.2
38816	106	4.2
38756	85	4.7
38650	82	5.4
38652	90	5.6
38431	81	6.4
79416	95	6.4
38555	98	6.87
38793	117	10.2
75891	131	12.4
79413	108	13.7
