# Supplementary material for: Modulation of Prdm9-controlled meiotic chromosome asynapsis overrides hybrid sterility in mice
Source: eLife. 2018 Mar 14;7:e34282. doi: 10.7554/eLife.34282 (PMC5902161; doi:10.7554/eLife.34282)
Supplement: Figure 4—source data 3. — The effect of the size and location of PWD/PWD consubspecific intervals on asynapsis of Chrs 15, 16, 18 and 19 and on fertility parameters. [file elife-34282-fig4-data3.xlsx]

## Sheet: Table S12
Figure 4–source data 3. Four-chr cross. The effect of the size and location of PWD/PWD consubspecific intervals on asynapsis of Chrs 15, 16, 18 and 19 and on fertility parameters.
Male ID	Distance from the centromere of Chr 151									Asynapsis of Chr 15		Distance from the centromere of Chr 16							Asynapsis of Chr 16		Dist. from the centromere of Chr 18					Asynapsis of Chr 18		Dist. from the centromere of Chr 19					Asynapsis of Chr 19		Sperm count2	Cells analyzed in Chrs 15, 16, 18, 19	PWD/PWD length3 in Chrs 15, 16, 18, 19
	(total length 104.0 Mb)											(total length 98.2 Mb)									(total length 90.7 Mb)							(total length 61.4 Mb)
	9.3	39.9	50.4	63.3	65.1	70	83.9	100.9	103.3	%	95% CI	6.2	14	29.3	39.1	42.7	67.6	97	%	95% CI	3.8	34	45.1	57.6	89.7	%	95% CI	3	21.9	33	42.4	59.7	%	95% CI	106	N	Mb, middle length
75890	PP	PP	PP	PP	PP	PP	PP	PP	PP	1.7	0.1; 7.3	PB		PP	PP	PP	PP		1.7	0.1; 8.5	PB	PB	PB	PB	PB	20.6	13.7; 28.9	PB	PB	PB	PB	PB	24.1	14.2; 36.3	0	59; 45; 107; 56	104.0; 60.6; 0.0; 0.0
79414	PP	PP	PP	PP	PP	PP		PB	PB	2.1	0.3; 6.4	PB	PB	PB	PB	PB	PB	PB	16.7	10.5; 24.5	PB	PB	PB	PB	PB	28.1	17.6; 40.6	PB	PB	PB	PB	PB	26	17.9; 35.3	0	94; 108; 57; 96	77.0; 0.0; 0.0; 0.0
38435	PB	PB	PB	PB	PB	PB	PB	PB	PB	25	17.2; 34.0	PP	PP	PP		PB	PB	PB	4	1.3; 9.0	PB	PB	PB	PB	PB	39	29.8; 48.7	PB	PB	PB	PB	PB	33	24.3; 42.6	0	100; 100; 100; 100	0.0; 34.2; 0.0; 0.0
38087	PB	PB	PB	PB	PB	PB	PB	PB	PB	14	8.1; 21.7	PB	PB	PB	PB	PB	PB	PB	11	5.9; 18.1	PB	PB	PB	PB	PB	18	11.3; 26.3	PP		PB	PB	PB	10	4.9; 17.3	0	100; 100; 100; 90	0.0; 0.0; 0.0; 12.5
38432	PB	PB	PB	PB		PP	PP	PP	PP	0	0.0; 2.0	PB	PB	PB	PB	PB	PB	PB	19	12.1; 27.4	PP	PP	PP	PP	PP	0	0.0; 2.0	PB	PB	PB	PB	PB	36	27.0; 45.7	0	100; 100; 100; 100	36.5; 0.0; 90.7; 0.0
38425	PP	PP	PP	PP	PP	PP		PB	PB	0	0.0; 2.0	PP	PP	PP	PP	PP		PB	0	0.0; 2.0		PP	PP	PP	PP	1	0.1; 4.3	PB	PB	PB	PB	PB	23	15.5; 31.9	0.1	100; 100; 100; 100	77.0; 55.1; 71.7; 0.0
38086	PB	PB		PP	PP	PP	PP	PP	PP	2	0.3; 6.0	PP		PB	PB	PB	PB	PB	4	1.3; 9.0	PP	PP	PP	PB	PB	1	0.1; 4.3	PP	PP	PP	PP	PP	0	0.0; 2.0	0.23	100; 100; 100; 100	47.2; 10.1; 39.5; 61.4
38759	PB	PB	PB	PB	PB	PB	PB		PP	2.6	0.4; 7.8	PB	PB	PB		PP	PP	PP	0	0.0; 2.0	PB	PB	PB	PB	PB	15	8.9; 22.8	PP	PP	PP	PP	PP	0	0.0; 2.0	0.6	78; 100; 100; 100	1.9; 57.3; 0.0; 61.4
38736	PP		PB	PB	PB	PB		PP	PP	4	1.3; 9.0	PB	PB	PB	PB	PB	PB	PB	18	11.3; 26.3	PB	PB		PP		8	3.7; 14.4	PP	PP	PP		PB	0	0.0; 3.0	1.1	100; 100; 100; 65	36.2; 0.0; 22.5; 37.5
38741	PP		PB	PB	PB	PB	PB	PB	PB	5	1.8; 10.4	PB		PP	PP	PP	PP	PP	1	0.1; 4.3	PP	PP	PP	PP		0	0.0; 2.0	PB		PP	PP	PP	2.3	0.4; 6.5	1.2	100; 100; 100; 100	24.6; 76.6; 74.0; 33.9
38737	PB	PB	PB	PB		PP		PB	PB	1	0.1; 4.3	PB	PB	PB	PB	PB	PB	PB	18	11.3; 26.3	PP	PP	PP	PP	PP	0	0.0; 2.0	PP	PP	PP	PP	PP	0	0.0; 2.0	1.9	100; 100; 100; 100	9.4; 0.0; 90.7; 61.4
38692	PB	PB	PB	PB	PB	PB	PB	PB	PB	8	3.7; 14.4	PB	PB	PB		PP	PP		0	0.0; 2.0	PB		PP	PP	PP	0	0.0; 2.0	PP	PP	PP	PP	PP	0	0.0; 2.0	2.2	100; 100; 100; 100	0.0; 41.4; 51.2; 61.4
38433	PP	PP	PP	PP	PP	PP		PB	PB	0	0.0; 2.0	PP	PP	PP	PP	PP	PP	PP	0	0.0; 2.0		PP	PP	PP		0	0.0; 2.0	PP	PP	PP	PP		0	0.0; 2.0	4.2	100; 100; 100; 100	77.0; 98.2; 55.0; 51.0
38756	PB	PB	PB	PB	PB	PB	PB	PB	PB	13	7.4; 20.5	PP	PP	PP	PP	PP	PP	PP	0	0.0; 2.0	PP	PP	PP	PP		0	0.0; 2.0		PP	PP	PP	PP	0	0.0; 2.0	4.7	100; 100; 100; 100	0.0; 98.2; 74.0; 48.9
38650	PP		PB	PB	PB	PB	PB	PB	PB	2	0.3; 6.0	PP	PP	PP	PP	PP	PP	PP	0	0.0; 2.0		PP	PP	PP		0	0.0; 2.0	PP	PP	PP	PP		0	0.0; 2.0	5.4	100; 100; 100; 100	24.6; 98.2; 55.0; 51.0
38652	PB	PB	PB	PB	PB	PB		PP	PP	6	2.4; 11.8	PP	PP	PP	PP	PP	PP	PP	0	0.0; 2.0		PP	PP	PP		0	0.0; 2.2	PP	PP	PP	PP	PP	0	0.0; 2.0	5.6	100; 100; 91; 100	11.6; 98.2; 55.0; 61.4
38431	PB	PB	PB	PB		PP	PP		PB	3	0.8; 7.6	PP	PP	PP	PP	PP		PB	0	0.0; 2.0	PP	PP	PP	PP	PP	0	0.0; 2.0	PP	PP	PP	PP	PP	0	0.0; 2.0	6.4	100; 100; 100; 100	24.9; 55.1; 90.7; 61.4
38555	PP	PP		PB	PB	PB	PB	PB	PB	2	0.3; 6.0	PB		PP	PP	PP	PP	PP	1	0.1; 4.3	PB		PP	PP	PP	0	0.0; 2.0	PP	PP	PP	PP		0	0.0; 2.0	6.9	100; 100; 100; 100	45.1; 76.6; 51.2; 51.0
1The minimal and maximal length of PWD/PWD interval was determined by positions of the DNA markers used for genotyping. White and orange intervals are heterozygous PWD/B6 and homozygous PWD/PWD, respectively. Recombination breaks are located in gray intervals.
2Sperm count refers to the number of sperm cells in both epididymis.
3The average between minimum and maximum PWD/PWD consubspecific sequence is given.
