# Supplementary material for: Modulation of Prdm9-controlled meiotic chromosome asynapsis overrides hybrid sterility in mice
Source: eLife. 2018 Mar 14;7:e34282. doi: 10.7554/eLife.34282 (PMC5902161; doi:10.7554/eLife.34282)
Supplement: Figure 5—source data 1. — The relation between observed and calculated rate of pachytene asynapsis and fertility parameters. [file elife-34282-fig5-data1.xlsx]

## Sheet: Table S12
Figure 5–source data 1. Four-chr cross experiment. The relation between observed and calculated rate of pachytene asynapsis and fertility parameters
Male ID	Testes (mg)	Sperm No x 10-6	Frequency of Chr synapsed				Probability of all 4 chr synapsed	Probability of all 19 synapsed	Probability of asynaptic pachy	Obs ratio of asynaptic pachy	Obs ratio of all 19 synapsed
			15	16	18	19
38435	62	0	0.75	0.96	0.61	0.67	0.294264	0.0785685	0.921432	0.79	0.21
38087	64	0	0.86	0.89	0.82	0.9	0.564865	0.150819	0.849181	0.61	0.39
75414	65	0	0.979	0.82	0.719	0.74	0.427127	0.114043	0.885957	0.66	0.34
38432	66	0	1	0.81	1	0.64	0.5184	0.138413	0.861587	0.65	0.35
75890	68	0	0.983	0.959	0.793	0.759	0.567397	0.151495	0.848505	0.63	0.37
38425	73	0.1	1	1	0.99	0.77	0.7623	0.203534	0.796466	0.58	0.42
38086	73	0.23	0.98	0.96	0.99	1	0.931392	0.248682	0.751318	0.36	0.64
38759	81	0.6	0.97	1	0.85	1	0.8245	0.220142	0.779859	0.49	0.51
38736	81	1.1	0.96	0.82	0.92	1	0.724224	0.193368	0.806632	0.48	0.52
38741	81	1.2	0.95	0.99	1	0.98	0.92169	0.246091	0.753909	0.48	0.52
38737	94	1.9	0.99	0.82	1	1	0.8118	0.216751	0.783249	0.4	0.6
38692	89	2.2	0.92	1	1	1	0.92	0.24564	0.75436	0.28	0.72
38433	78	4.2	1	1	1	1	1	0.267	0.733	0.28	0.72
38756	85	4.7	0.87	1	1	1	0.87	0.23229	0.76771	0.39	0.61
38650	82	5.4	0.98	1	1	1	0.98	0.26166	0.73834	0.36	0.64
38652	90	5.6	0.94	1	1	1	0.94	0.25098	0.74902	0.33	0.67
38431	81	6.4	0.97	1	1	1	0.97	0.25899	0.74101	0.46	0.54
38555	98	6.9	0.98	0.96	1	1	0.9408	0.251194	0.748806	0.255	0.745
