# Supplementary figures and images for: Modulation of Prdm9-controlled meiotic chromosome asynapsis overrides hybrid sterility in mice
Source: eLife journal article supplement (doi:10.7554/elife.34282), 2018-03-14

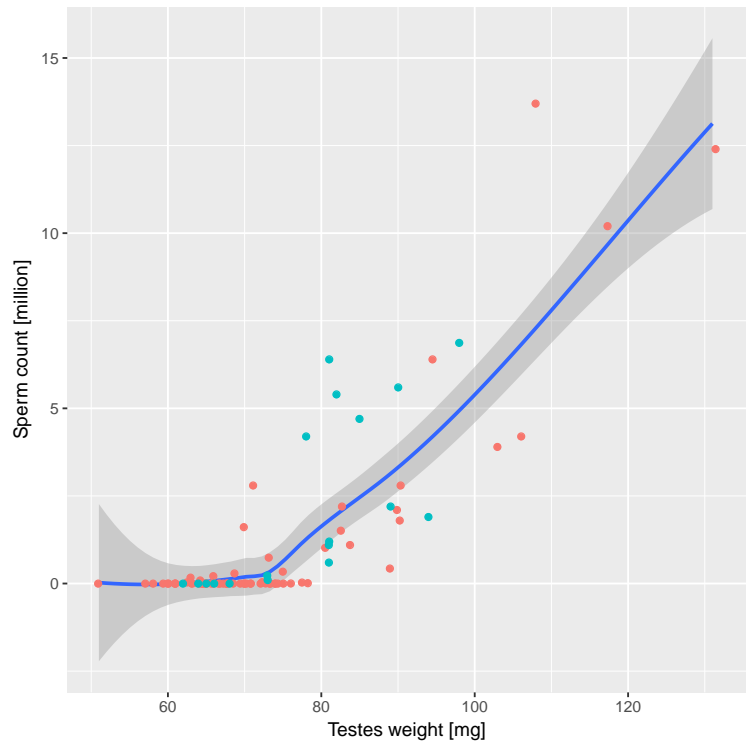

Supplement: supp [file elife_poa_e34282_Figure_4_figure_supplement_1.pdf › elife_poa_e34282_Figure_4_figure_supplement_1.pdf]

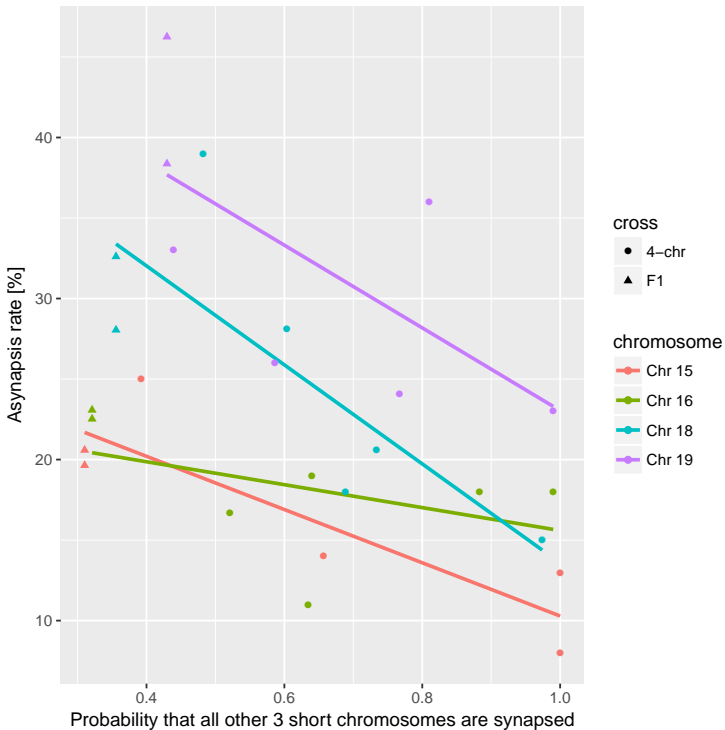

Supplement: supp [file elife_poa_e34282_Figure_5_figure_supplement_1.pdf › elife_poa_e34282_Figure_5_figure_supplement_1.pdf]

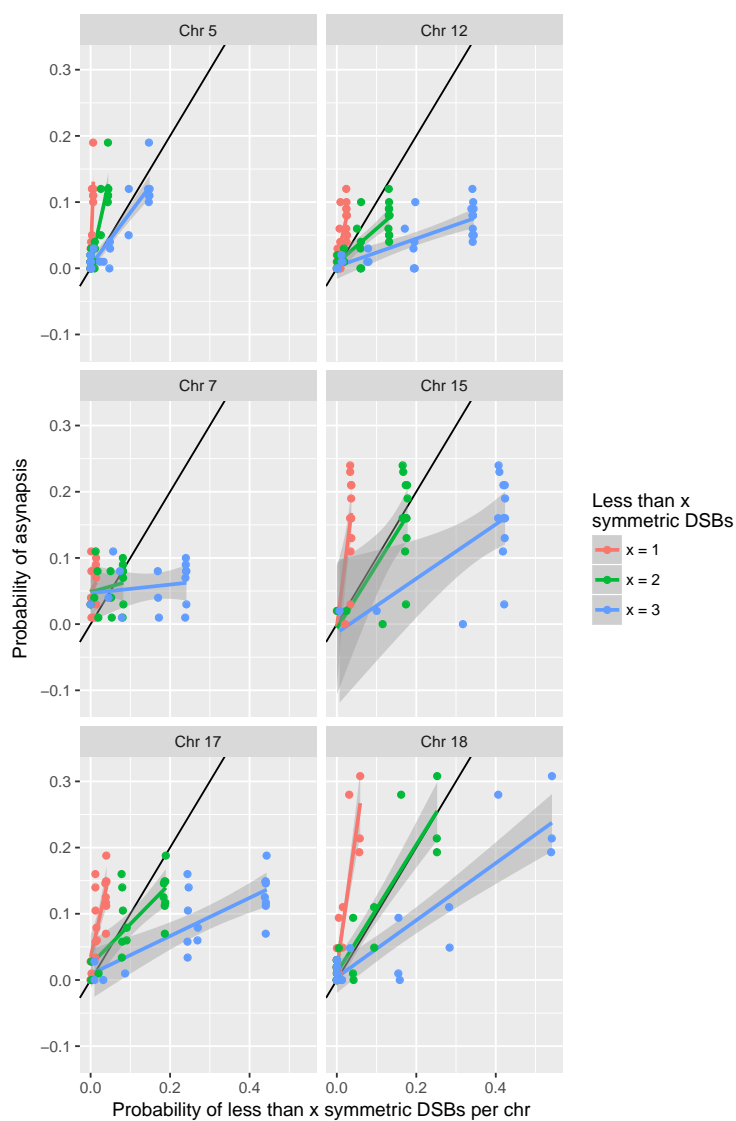

Supplement: supp [file elife_poa_e34282_Figure_6_figure_supplement_1.pdf › elife_poa_e34282_Figure_6_figure_supplement_1.pdf]

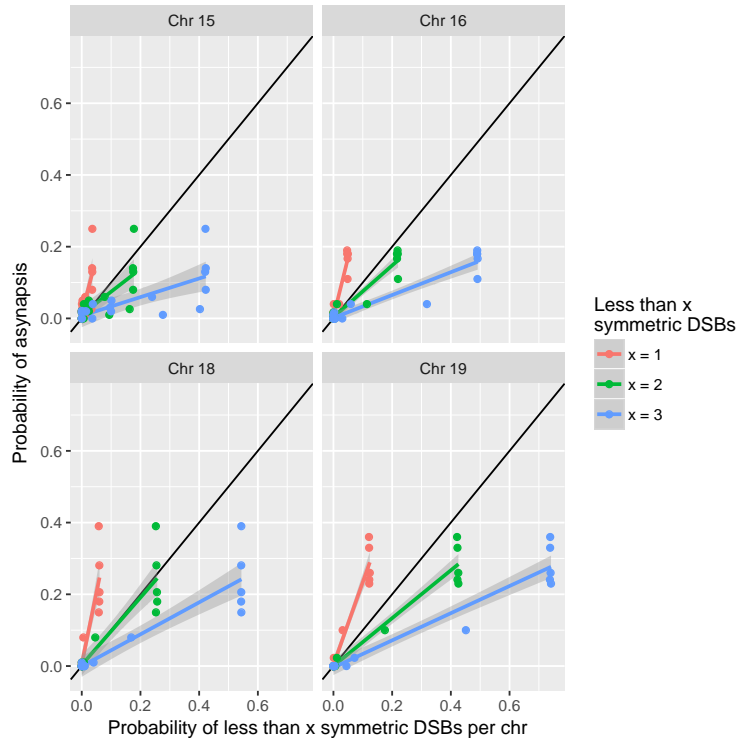

Supplement: supp [file elife_poa_e34282_Figure_6_figure_supplement_2.pdf › elife_poa_e34282_Figure_6_figure_supplement_2.pdf]
